# Supplementary figures and images for: The SSVEP tracks attention, not consciousness, during perceptual filling-in
Source: eLife journal article supplement (doi:10.7554/elife.60031), 2020-11-10

a) Visible PMD period

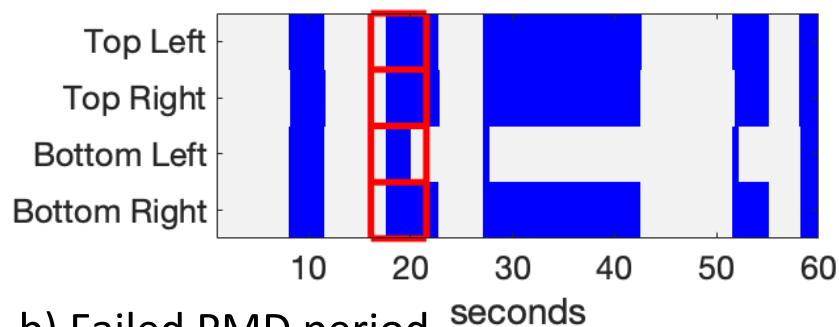

b) Failed PMD period

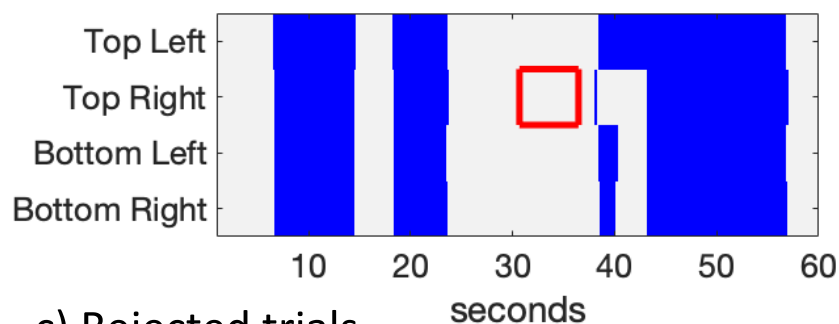

c) Rejected trials

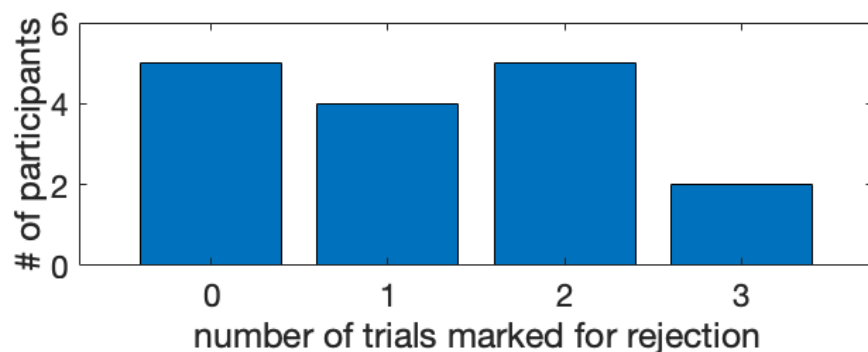

d)

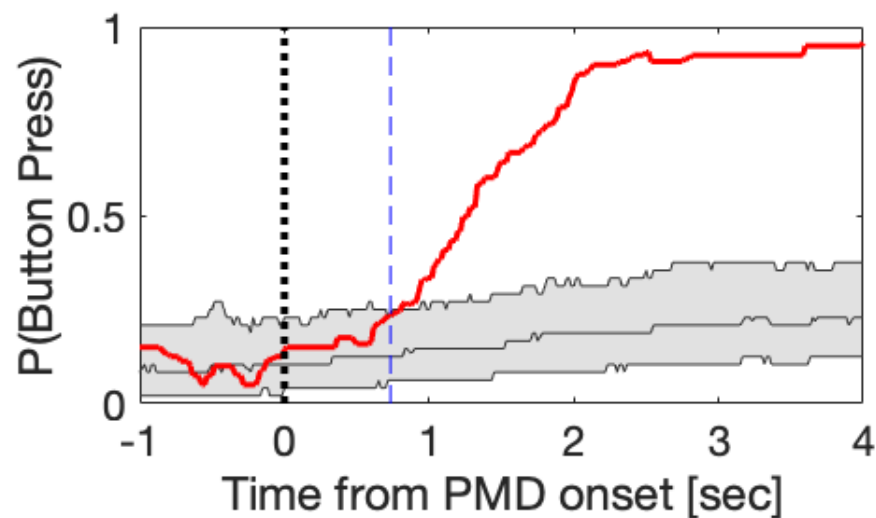

e)

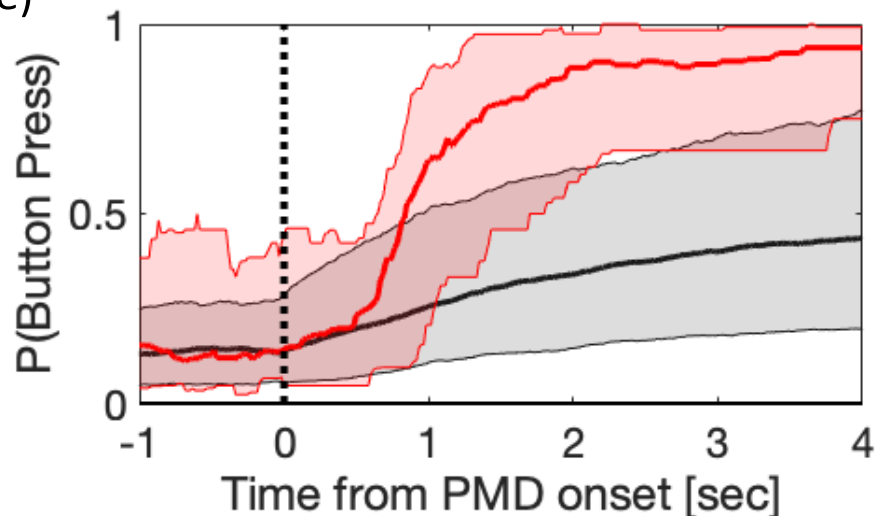

Supplement: supp [file elife-60031-supp-v1.zip]

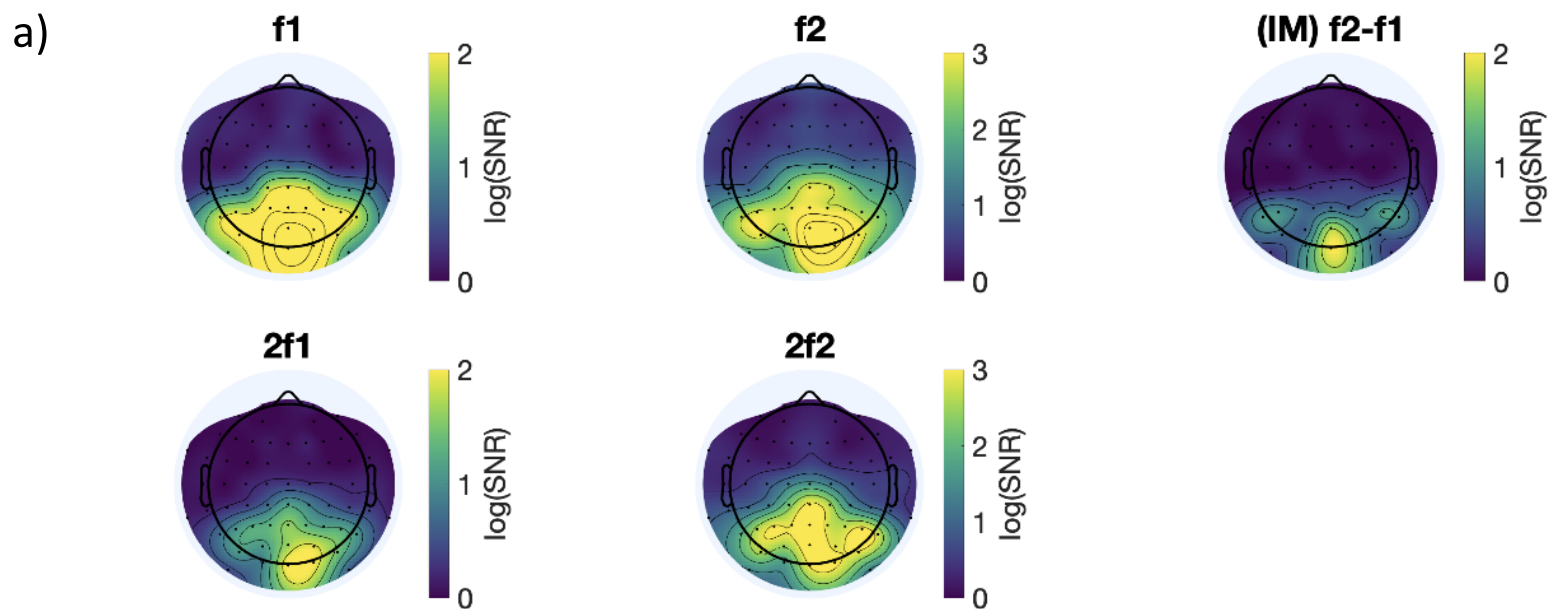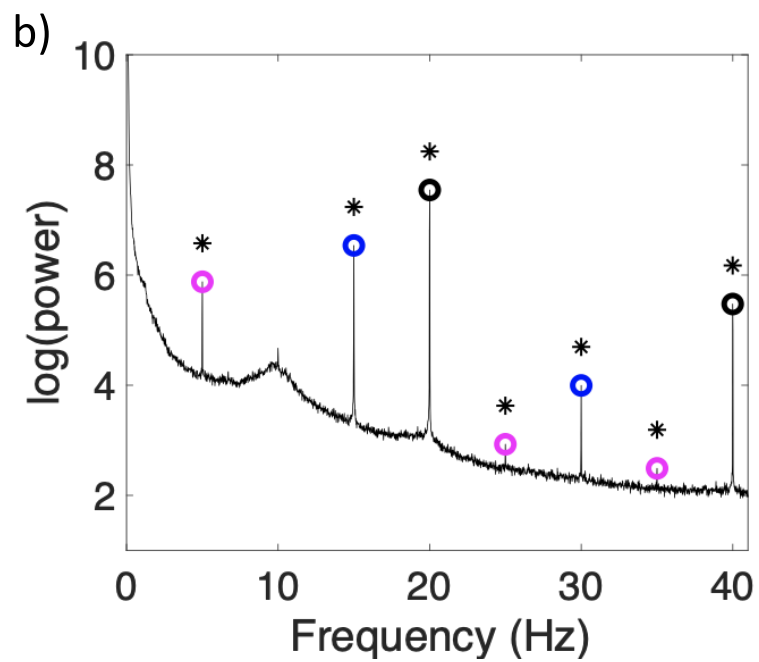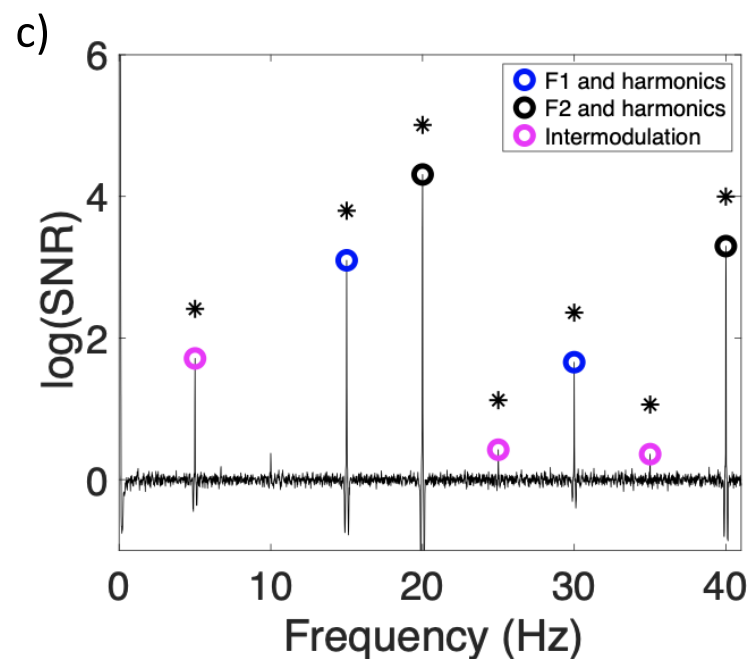

Supplement: supp [file elife-60031-supp-v1.zip]

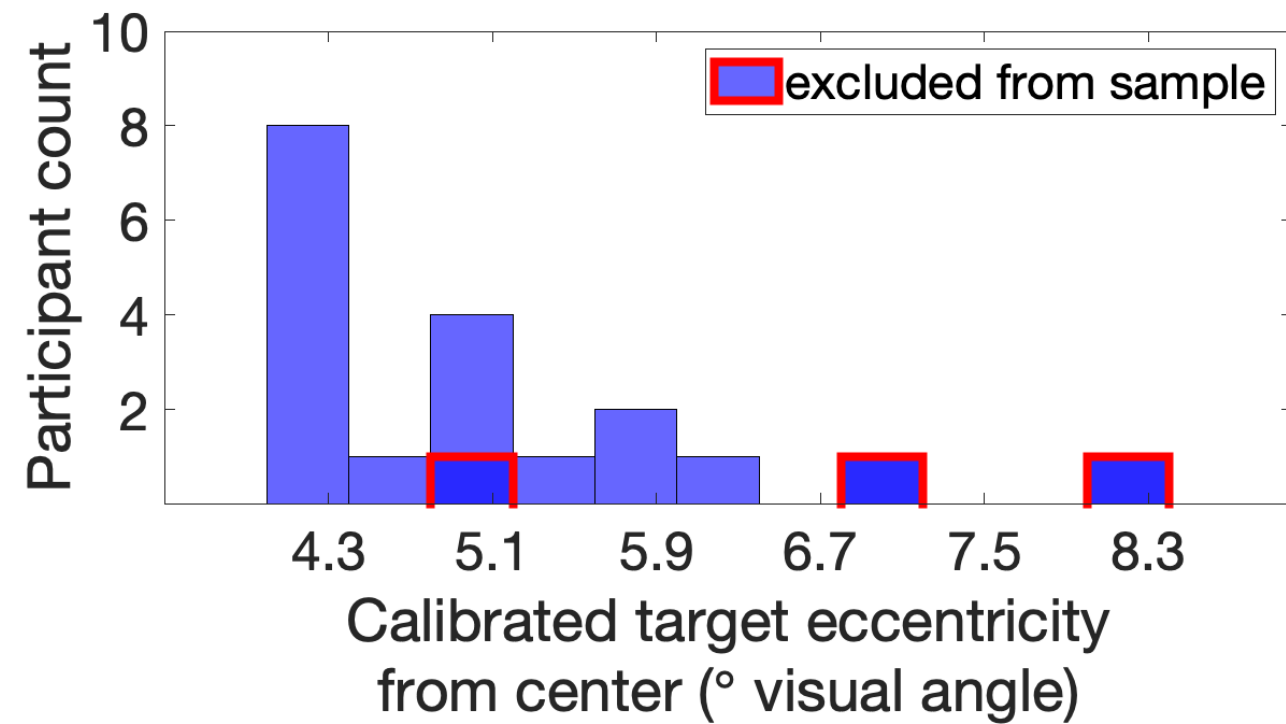

Supplement: supp [file elife-60031-supp-v1.zip]

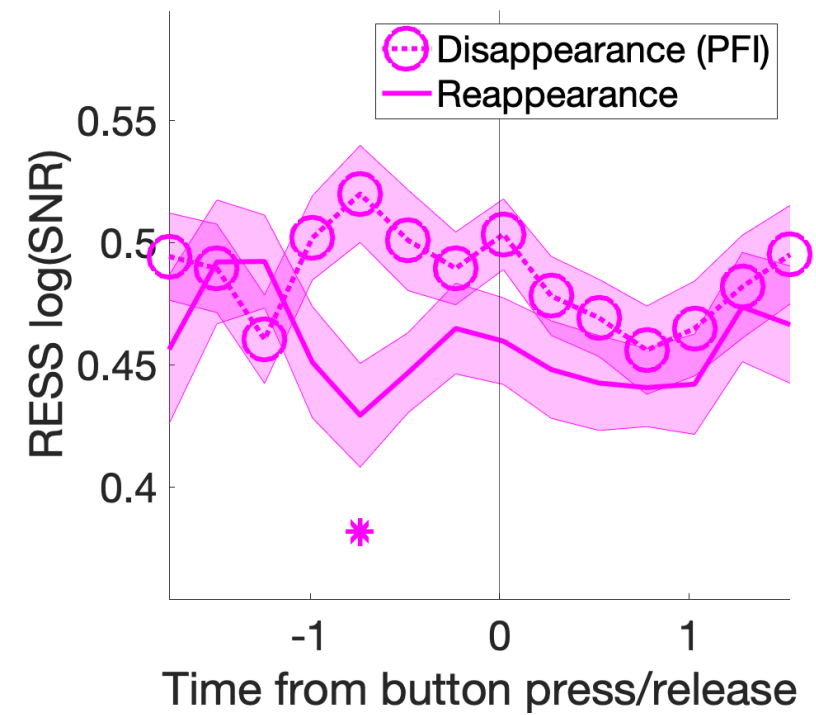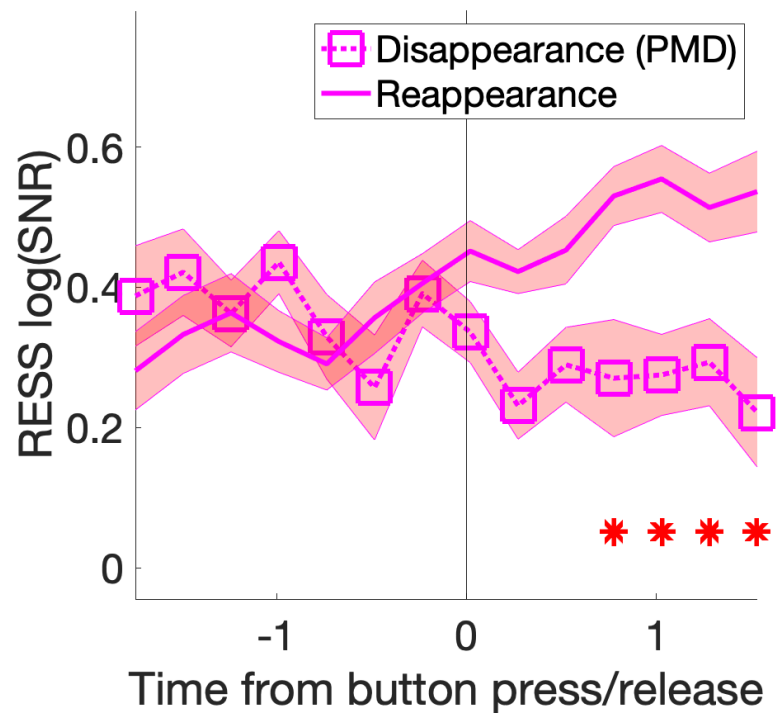

Supplement: supp [file elife-60031-supp-v1.zip]

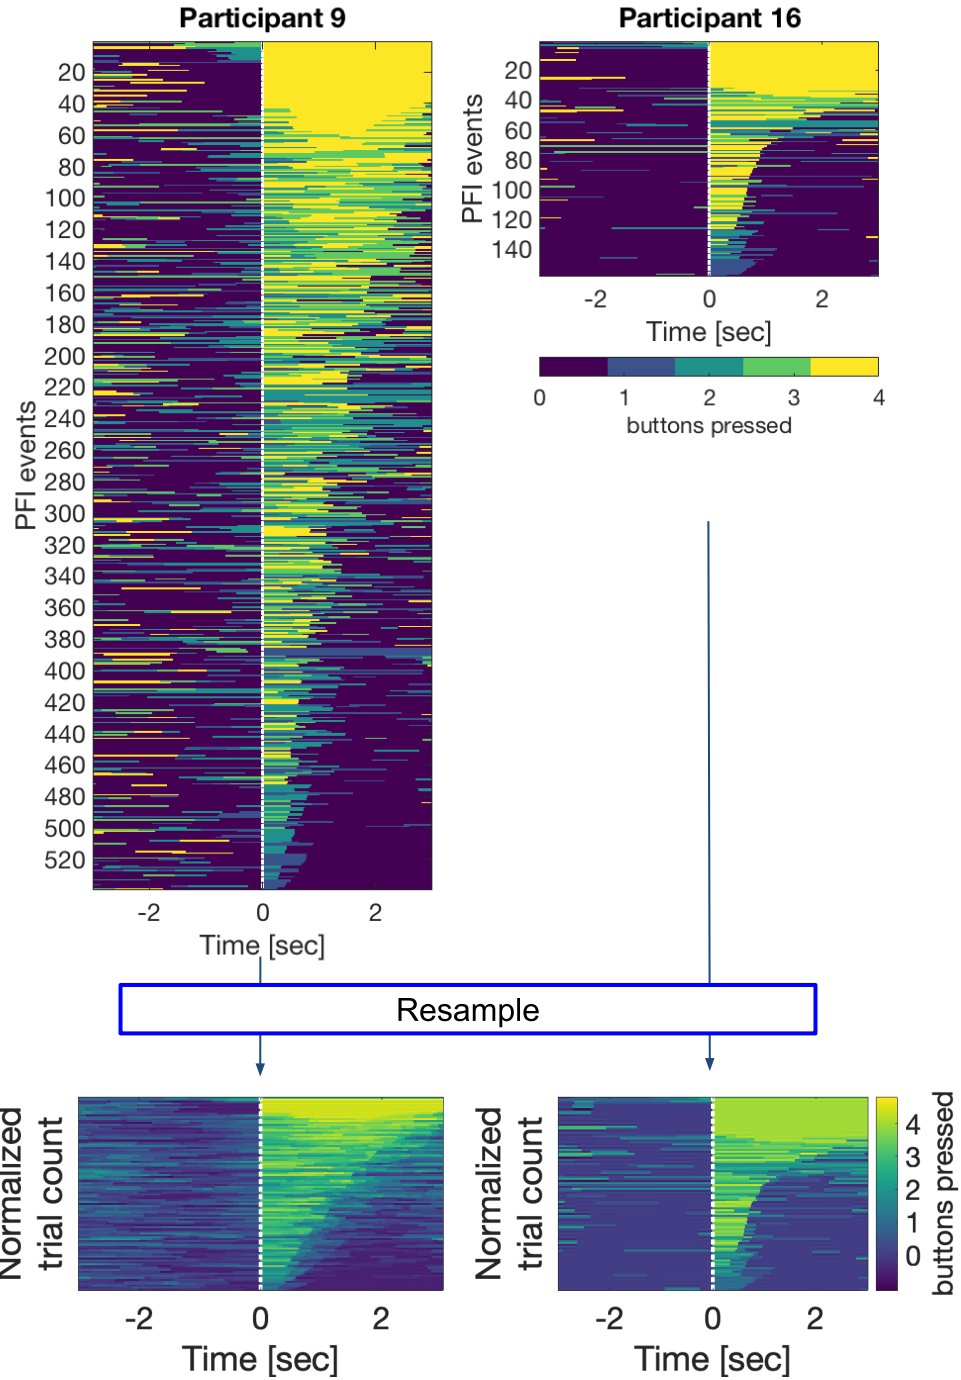

Supplement: supp [file elife-60031-supp-v1.zip]

a) Example Observed trial

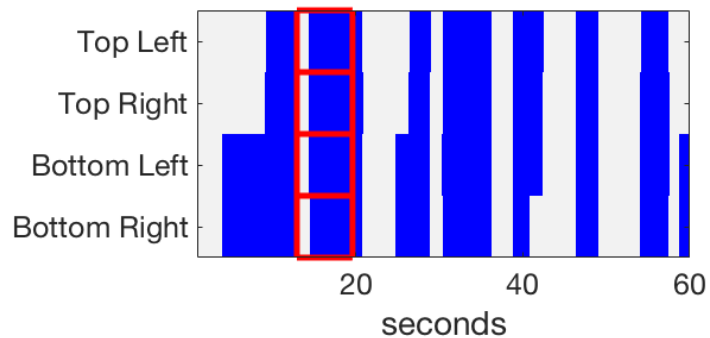

b) Example Shuffled trial

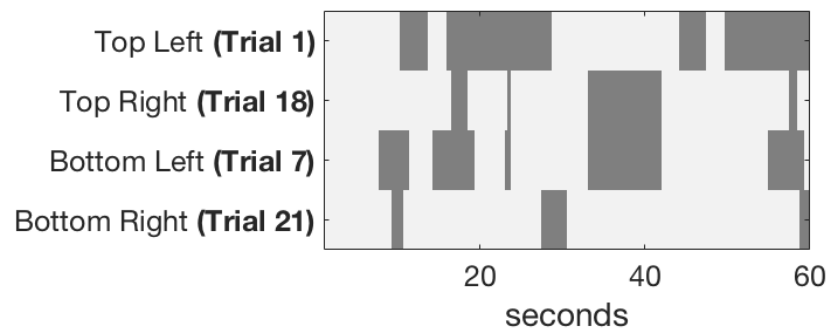

c)

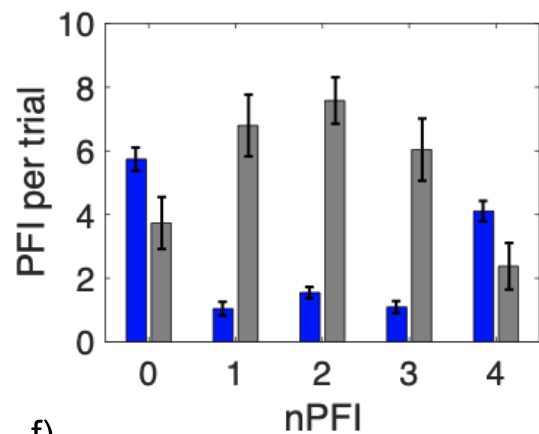

d)

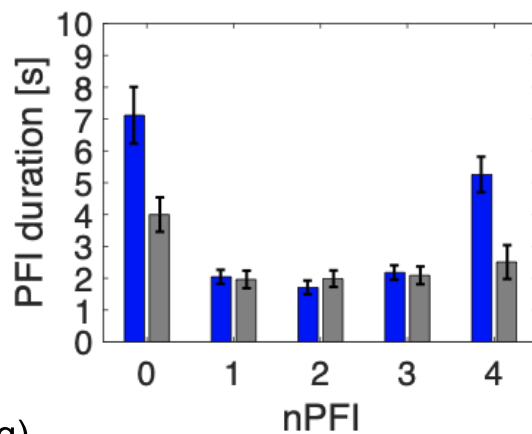

e)

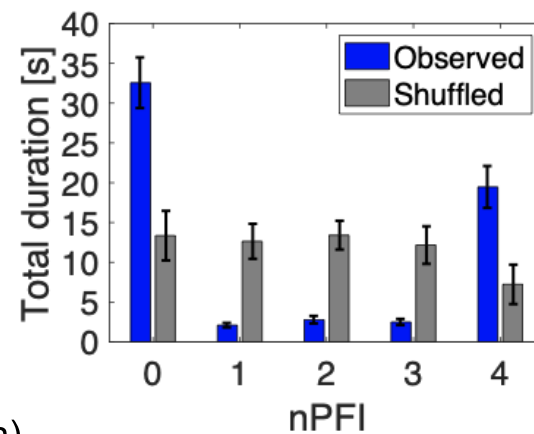

f)

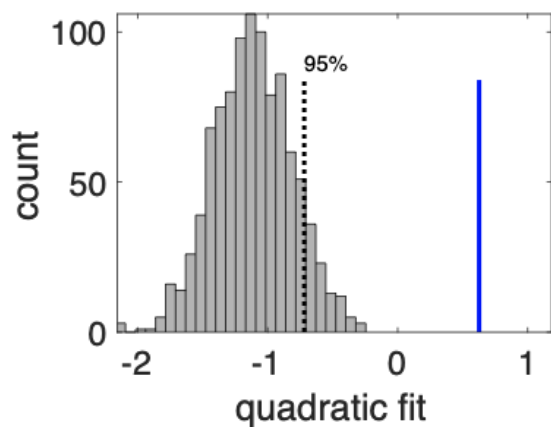

g)

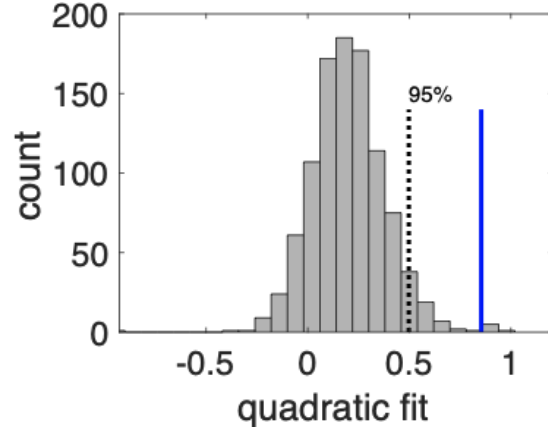

h)

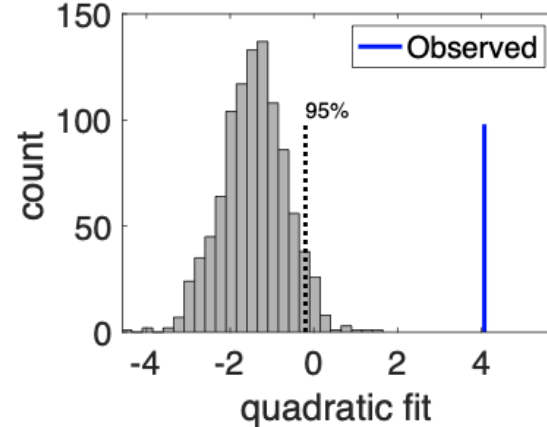

Supplement: supp [file elife-60031-supp-v1.zip]
